# Supplementary material
Source: PubMed Central journal article supplement (PMC517611)
Supplement: 7600371s1.pdf [file 7600371s1.pdf]

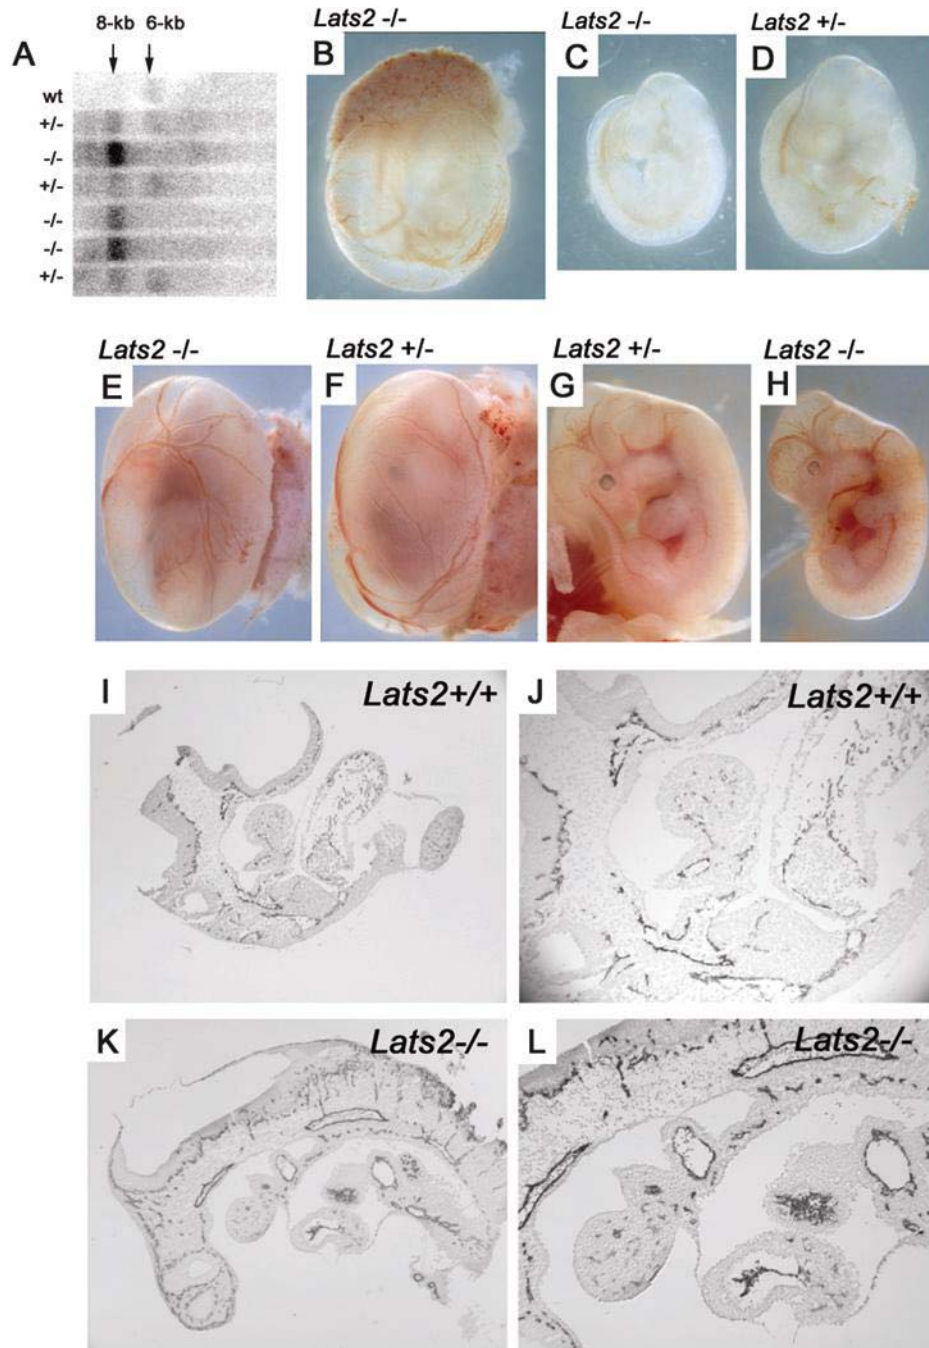

**Supplementary Figure 1.** A, Northern analysis of RNA extracted from E9.5 embryos derived from *Lats2*<sup>+/-</sup> heterozygous mating. RNA extracted from each embryo (5 μg) was denatured, separated on a formaldehyde-agarose gel, and transferred to a nylon membrane (Hybond-N<sup>+</sup>, Amersham) according to standard methodology. The membrane was hybridized with a probe derived from a full-length *Lats2* cDNA probe. Embryos were genotyped using PCR from yolk sac gDNA. B-H, Representative photomicrographs depicting yolk sac morphology of *Lats2*<sup>-/-</sup> embryos. Whole mount photos of embryos at E9.5 (B-D) and E12.5 (E-H). *Lats2*<sup>-/-</sup> embryos from E9.5 to E12.5 exhibited normal

placental morphology, normal yolk sac morphology, normal yolk sac vascularization and blood islands. The *Lats2*<sup>-/-</sup> E9.5 embryo depicted (**B,C**) exhibited decreased BrdU incorporation (not shown) compared to the heterozygous control (**D**). **I-L**, Representative immunohistochemical detection of PECAM (CD31) in whole embryonic sections (**I,K**) and cardiac regions (**J,L**) from wild-type and *Lats2*<sup>-/-</sup> embryos.

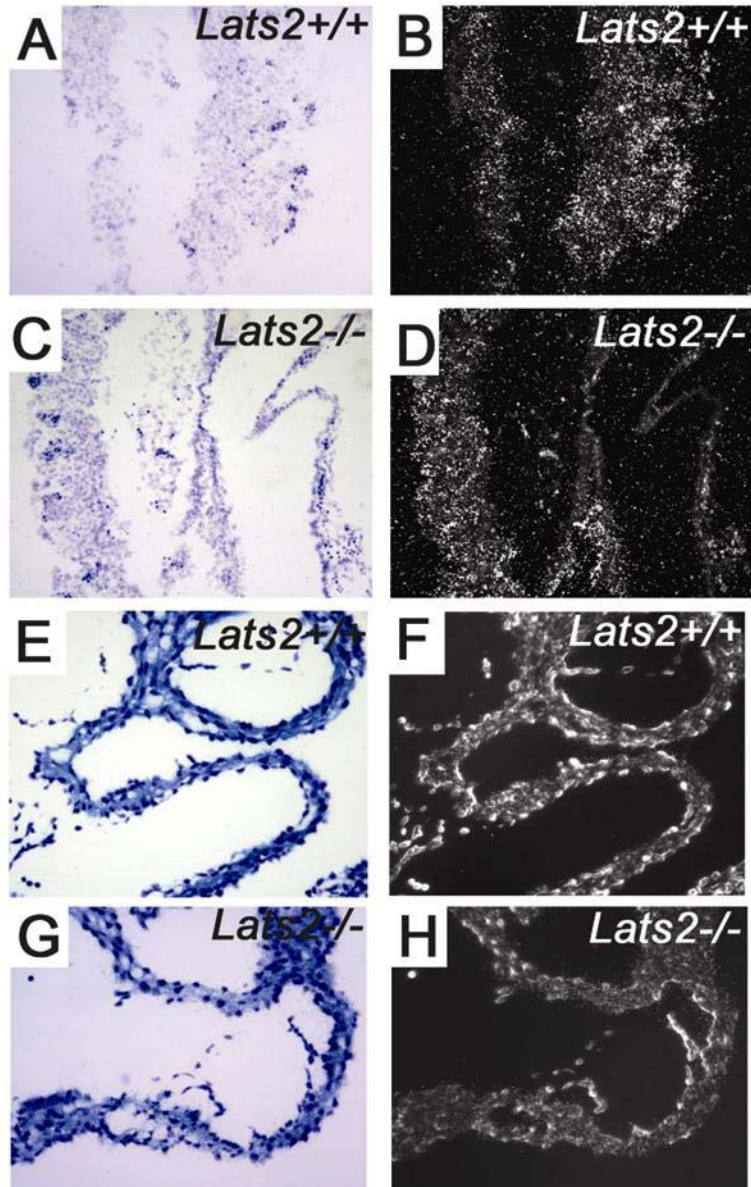

**Supplementary Figure 2.** A-D, PPAR $\gamma$  expression in placentae derived from wild-type and *Lats2*<sup>-/-</sup> E10.5 embryos as determined by *in situ* hybridization. E-H, Nkx2.5 expression in cardiac region of wild-type and *Lats2*<sup>-/-</sup> E9.5 embryos as determined by *in situ* hybridization.

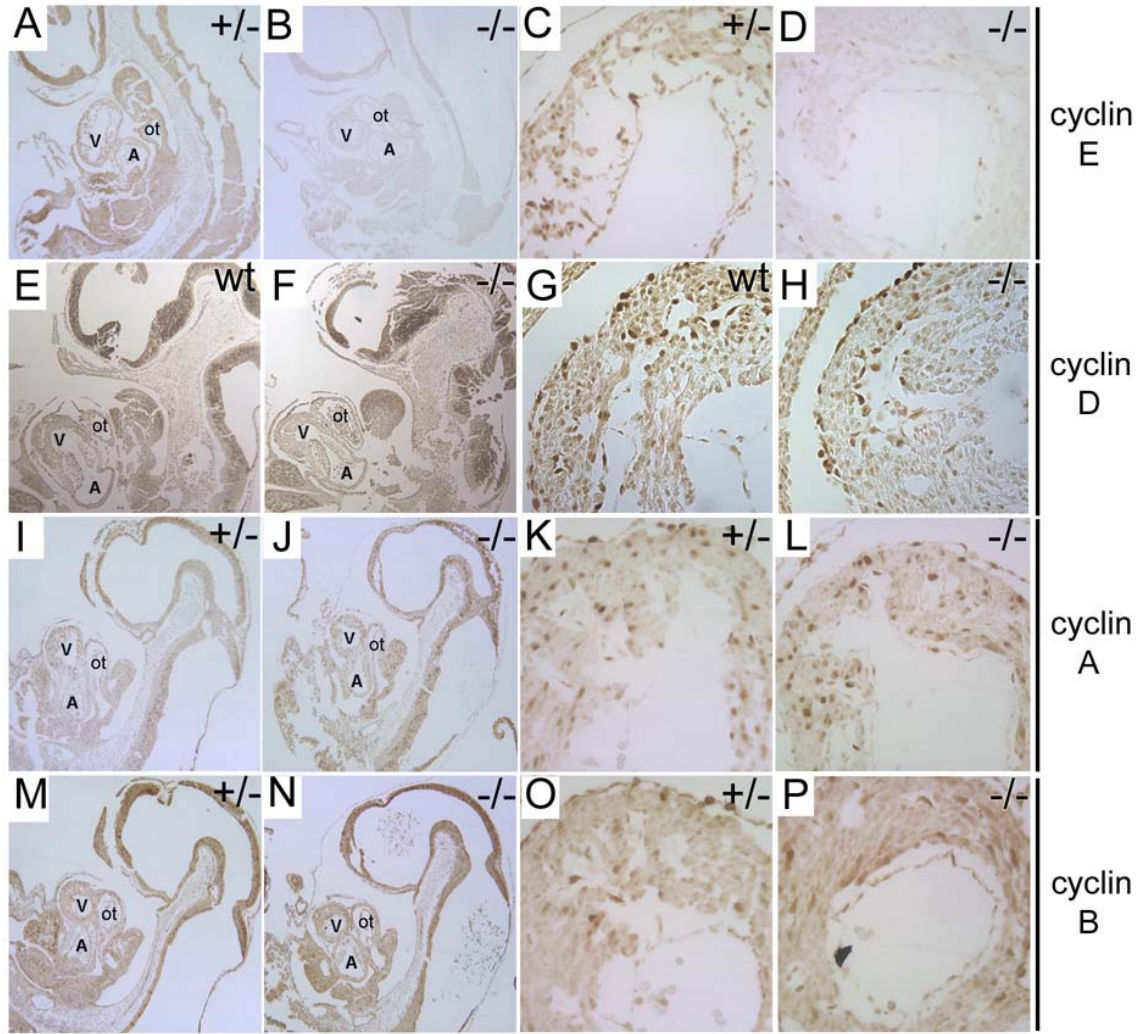

**Supplementary Figure 3.** Cyclin expression in *Lats2*-deficient E10.5 embryos. Immunostaining of E10.5 mid-sagittal embryonic sections using antibodies specific for cyclin E (A-D); cyclin D (E-H); cyclin A (I-L) or cyclin B (M-P). A,B,E,F,I,J,M,N, mid-sagittal sections of E10.5 embryos at 5X magnification (v, ventricle; ot, outflow tract; A, atrium). C,D,G,H,K,L,O,P, heart ventricle at 40X magnification.



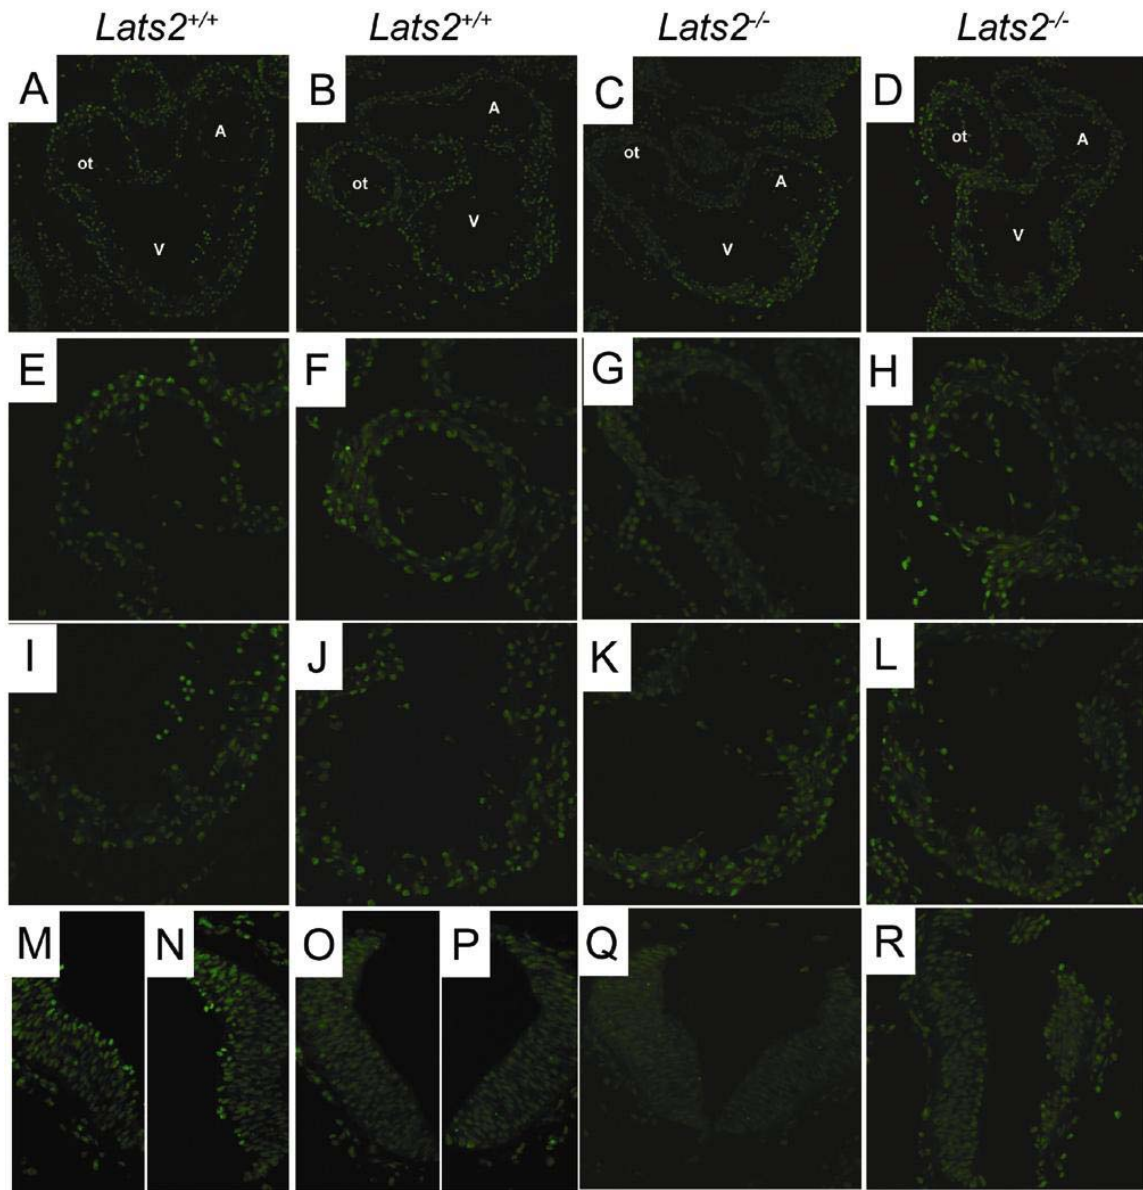

**Supplementary Figure 4.** TUNEL analysis for apoptosis of E9.5 embryos. Horizontal sections through the heart show no apoptotic nuclei after TUNEL reaction performed to label nicks in DNA caused by apoptotic degradation. **A-D**, heart area at 20x magnification (ot, outflow tract; V, left side of common ventricle chamber; A, common atrial chamber). **E-H**, aortic arch at 40x magnification. **I-L**, ventricle at 40x magnification. **M-R**, neural tube area at 40x magnification shows normal apoptosis profiles for wild-type and *Lats2*<sup>-/-</sup> embryos. Brightness and contrast of images have been adjusted to show some background auto fluorescence of unstained cells for orientation purposes.

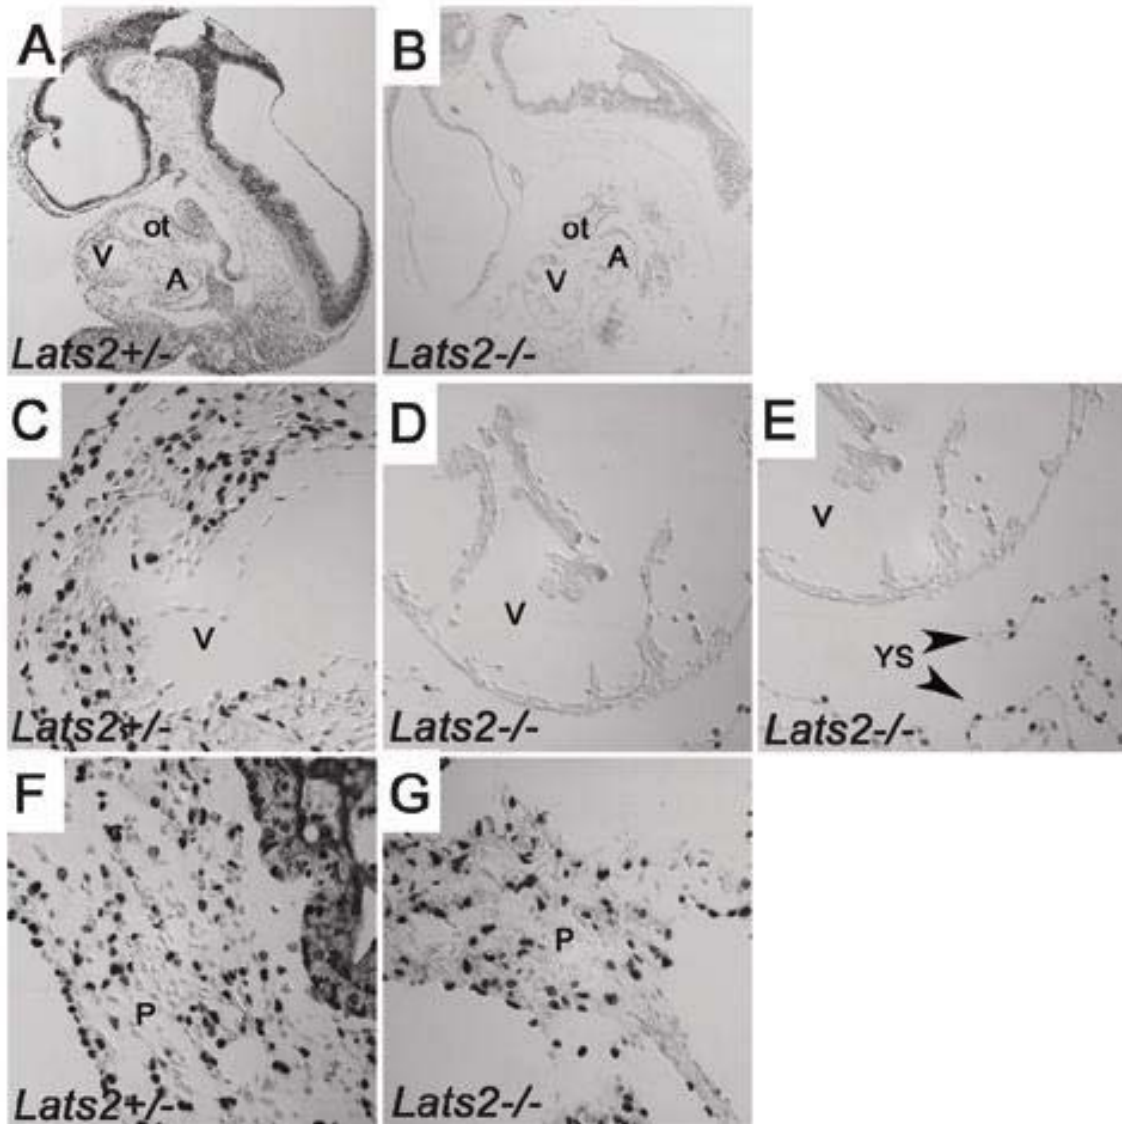

**Supplementary Figure 5.** A-G, BrdU incorporation in extraembryonic tissues of E10.5 *Lats2*<sup>+/-</sup> (A,C,F) and *Lats2*<sup>-/-</sup> (B,D,E,G) embryos (V, ventricle; ot, outflow tract; A, atrium; YS, yolk sac; P, placenta). The lack of BrdU incorporation in the *Lats2*<sup>-/-</sup> conceptus (B,D,E,G) contrasts with positively stained cells (arrowheads) seen in the extra-embryonic yolk sac (E) and placenta (G) that are comparable in number and staining intensity to the heterozygous littermate (F).

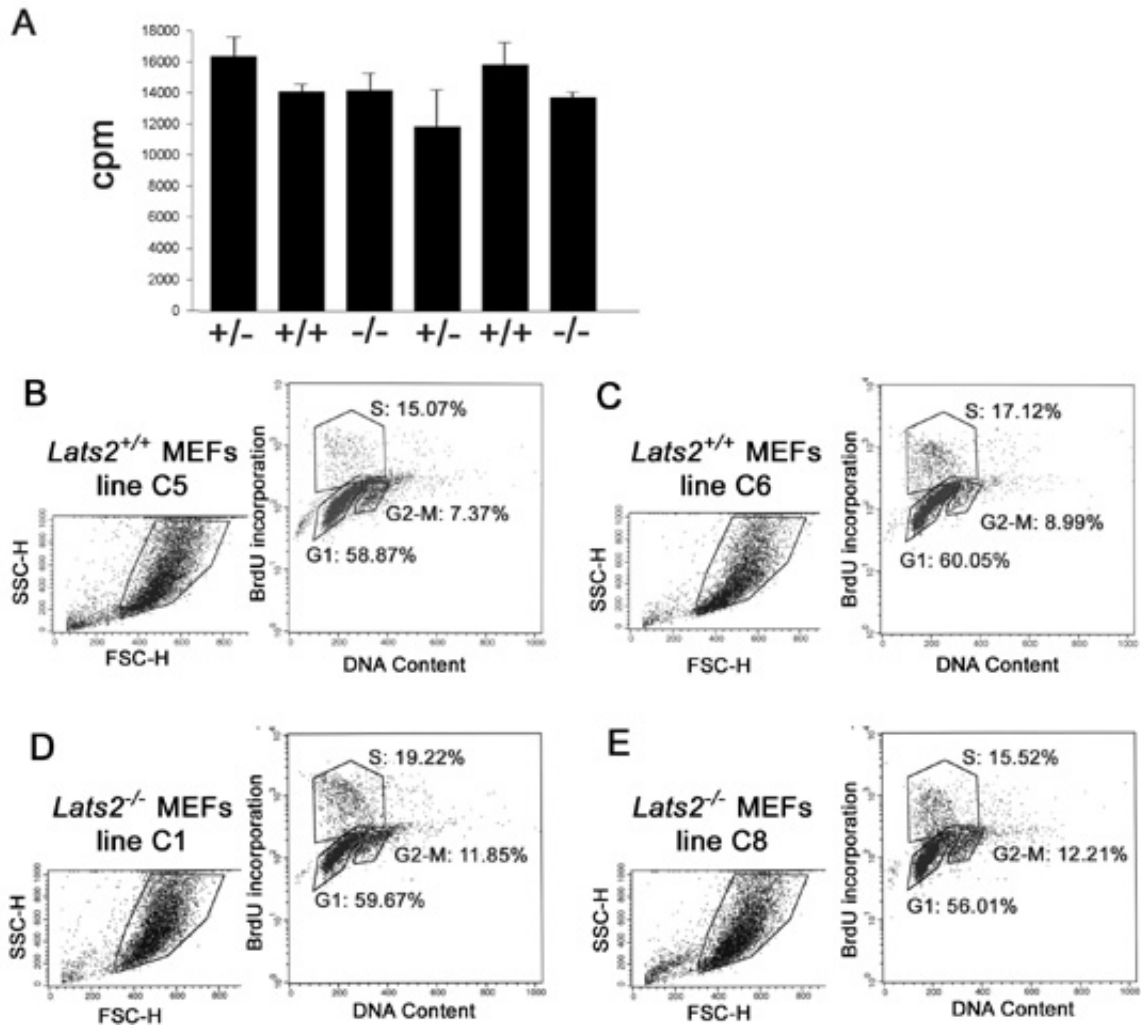

**Supplementary Figure 6. A**, No marked alteration in DNA synthesis was noted between wild-type and *Lats2*-deficient MEFs following examination of [<sup>3</sup>H] Thymidine incorporation. **B-E**, No marked alteration in cell cycle parameters was observed in *Lats2*-deficient MEFs compared to wild-type MEFs, following BrdU incorporation/propidium iodide staining.

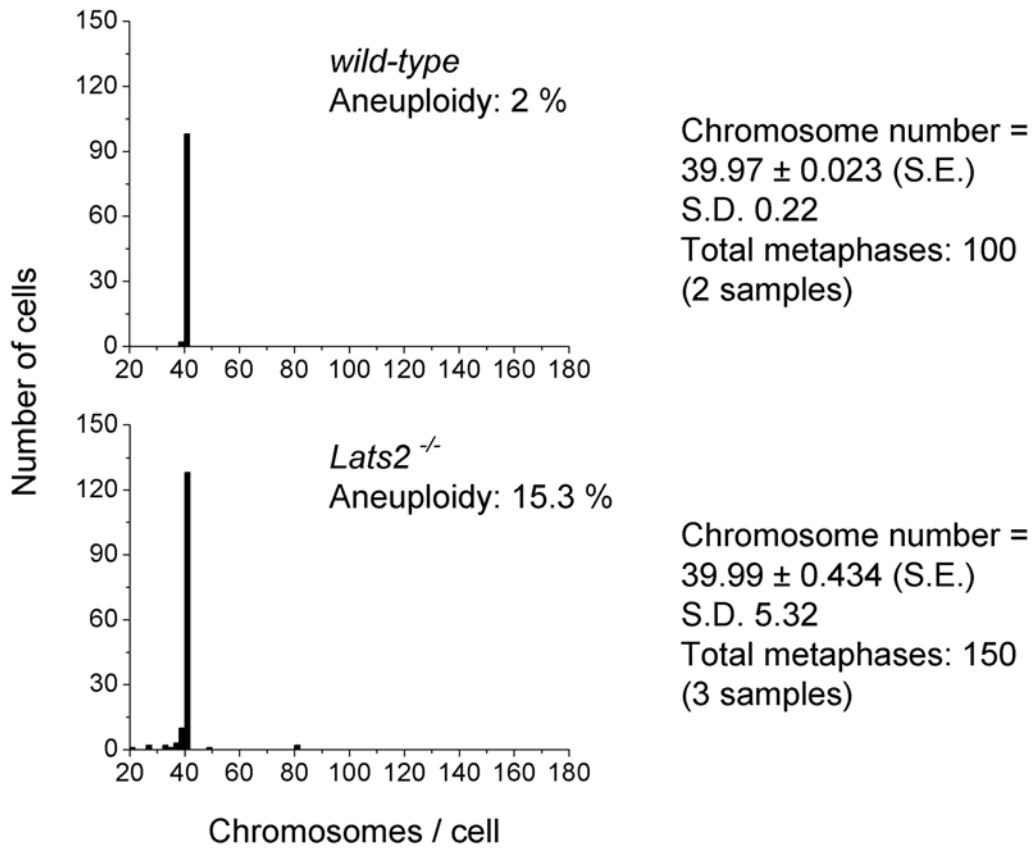

**Supplementary Figure 7.** Histograms depicting ploidy changes in wild-type and *Lats2<sup>-/-</sup>* embryos following colcemid treatment.
